# Supplementary material
Source: PubMed Central journal article supplement (PMC6126768)
Supplement: pnas.1722594115.sapp.pdf [file pnas.1722594115.sapp.pdf]

## Supplementary Information for

### ***Vegfaa* instructs cardiac muscle hyperplasia in adult zebrafish**

Ravi Karra<sup>a,b,1</sup>, Matthew J. Foglia<sup>b,c</sup>, Wen-Yee Choi<sup>b,c</sup>, Christine Belliveau<sup>a</sup>, Paige DeBenedittis<sup>a</sup>, and Kenneth D. Poss<sup>b,c,1</sup>

<sup>a</sup> Department of Medicine, Duke University Medical Center, Durham, NC 27710;

<sup>b</sup> Regeneration Next, Duke University, Durham, NC 27110;

<sup>c</sup> Department of Cell Biology, Duke University Medical Center, Durham, NC 27710

#### **Address correspondence to:**

Ravi Karra, Box 3126, Duke University Medical Center, Durham, North Carolina 27710, USA. Phone: 919.684.2449; E-mail: ravi.karra@duke.edu

or to:

Kenneth D. Poss, Department of Cell Biology, Duke University Medical Center, Durham, North Carolina 27710, USA. Phone: 919.681.8457; E-mail: kenneth.poss@duke.edu.

#### **This PDF file includes:**

- Supplementary text
- Figs. S1 to S5
- Legend for Dataset S1
- References for SI citations

## SI MATERIALS AND METHODS

**Zebrafish.** Wild-type or transgenic zebrafish of the EK/AB strain were used for all experiments. *βactin2:loxP-mCherry-STOP-loxP-DTA*, *βactin2:loxP-mTagBFP-STOP-loxP-nrg1*; *cmlc2:CreER*, *gata4:eGFP*, *LENP2:EGFP*, *tcf21:DsRed*, *fli1a:eGFP*, *kdrl:DsRed*; and *cmlc2:H2A-EGP*, transgenic fish have been described (1-8). Resection of ~20% of the cardiac ventricular apex was performed as described previously (9). To induce expression of *nrg1* in CMs, adult *cmlc2:CreER*; *βact2:BS-nrg1* were treated for 24 hours with 5 μM tamoxifen. To induce ablation of CMs, adult *ZCAT* were treated for 24 hours with 1 μM tamoxifen. For larval experiments, *cmlc2:CreER*; *βact2:BS-vegfaa*; *cmlc2:H2A-EGFP* fish were treated with 10 μM 4-hydroxytamoxifen for 6 hours at 2 dpf. Embryos were then placed in egg water containing 0.1% DMSO, or 10 μM DAPT (Selleckchem) until 7 dpf as previously described (10, 11). Procedures involving animals were approved by the Institutional Animal Care and Use Committee at Duke University.

**Generation of Transgenic Zebrafish.** To generate *βact2:BS-vegfaa*, *vegfaa* cDNA was ligated into the *Agel/NotI* site of the *βact2:loxP-TagBFP-STOP-loxP* vector (12). To generate *vegfaa:EGFP* fish, the translational start codon of *vegfaa* in the BAC clone CH211-169N14 (BACPAC Resources Center) was replaced with the EGFP sequence by Red/ET recombineering technology (GeneBridges) as described in reference (6). The full names for these transgenic strains are *TgBAC(vegfaa:EGFP)<sup>pd260</sup>* and *Tg(βactin2:loxP-mTagBFP-STOP-loxP-vegfaa)<sup>pd262</sup>*. To induce recombination in adult fish, *cmlc2:CreER*; *βact2:BS-vegfaa* fish were bathed in 5 μM tamoxifen (Sigma) for 24 hours.

**Histologic Analysis and Imaging.** Probes for *vegfaa*, *raldh2*, *snai2*, *twist1*, *pdgfrb*, *notch1b*, and *deltaC* were generated from 6 dpf zebrafish cDNA by using the primer sequences *twist1b* forward: GTTTGAGCTACGCGTTCTCG; *twist1b* reverse: TGCACAGGATTCTCGAACTAGAGG; *snai2* forward: TTAGAGCAGATCAGCGCTGG; *snai2* reverse: CTTCCCAATCGGAGGCACTT; *pdgfrb* forward: GTCCAGTGGAGGAAAGACGG; *pdgfrb* reverse: ACATCAGCGCTTGTGTCTCA. In situ hybridization probes were prepared and hybridizations were performed with the aid of an InSituPro robot (Intavis) as described (1). Primary and secondary antibody staining for immunofluorescence was performed as described in (6). Antibodies used in this study were anti-PCNA (mouse; Sigma) at 1:200, anti-Mef2 (rabbit; Santa Cruz Biotechnology) at 1:75, CT3 (mouse; DSHB) at 1:150, anti-EGFP (rabbit; Abcam) at 1:200, Alexa Fluor 488 (mouse and rabbit; Life Technologies) at 1:200, Alexa Fluor 594 (mouse and rabbit; Life Technologies) at 1:200, and Alexa Fluor 633 (mouse; Life Technologies) at 1:200. Confocal imaging was performed using a Zeiss LSM 700 or a Zeiss LSM 510 microscope. Thickness of the compact muscle layer was determined by staining hearts with anti-Tnnt antibody, selecting the largest section, and performing tilescan confocal imaging. For each section, the primordial muscle layer was used to define the anatomic boundary of the compact muscle and the inner trabecular muscle. The primordial muscle layer can be visualized as a thin stripe with increased fluorescence with either BFP or after immunostaining for Tnnt. Maximal thickness was determined by taking the largest distance from the cortical muscle layer to the epicardial surface of Tnnt signal. Measurements were performed on blinded images using ImageJ (2). An analogous approach was used to quantify maximal *tcf21*<sup>+</sup> cell thickness from sections of hearts from *tcf21:DsRed* fish. Cardiomyocyte proliferation indices were obtained from confocal images of sections that were stained for Mef2 and PCNA. The resulting images were blinded, cropped to the resection plane, manually thresholded using ImageJ, and

subjected to segmentation analysis using the EBImage package of R/Bioconductor (13). The proliferation index is the number of Mef2<sup>+</sup>/PCNA<sup>+</sup> nuclei over the total number of Mef2<sup>+</sup> nuclei (2, 4, 6, 12, 14-16). Blinded regenerates were scored on a scale from 1 to 3 after staining for Tnnt as described in reference (17). Images from *cm1c2:H2A-EGFP* fish were quantified by blinding the images and manually thresholding the images using the “Spots” feature of the Imaris software package (Bitplane). Picro-Mallory staining was performed as described previously and imaging was performed using a Zeiss AxioImager.Z2 microscope (18, 19).

**RNA-Seq.** RNA was extracted by using whole ventricles from *cm1c2:CreER;  $\beta$ act2:BS-vegfaa* fish as previously described (15). RNA libraries were generated and sequencing was performed through the Duke Sequencing and Genome Technologies Shared Resource. RNA-seq data was processed using the TrimGalore toolkit which employs Cutadapt to trim low quality bases and Illumina sequencing adapters from the 3' end of the reads (20, 21). Only reads that were 20nt or longer after trimming were kept for further analysis. Reads were mapped to the GRCz10v87 version of the zebrafish genome and transcriptome using the STAR RNA-seq alignment tool. Reads were kept for subsequent analysis if they mapped to a single genomic location (22, 23). Gene counts were compiled using the HTSeq tool (24). Only genes that had at least 10 reads in any given library were used in subsequent analysis. Normalization and differential expression was carried out using the DESeq2 Bioconductor package with the R statistical programming environment (25-27). The false discovery rate was calculated to control for multiple hypothesis testing. Gene set enrichment analysis was performed to identify differentially regulated gene ontology terms for each of the comparisons performed (28).

## SUPPLEMENTARY FIGURES

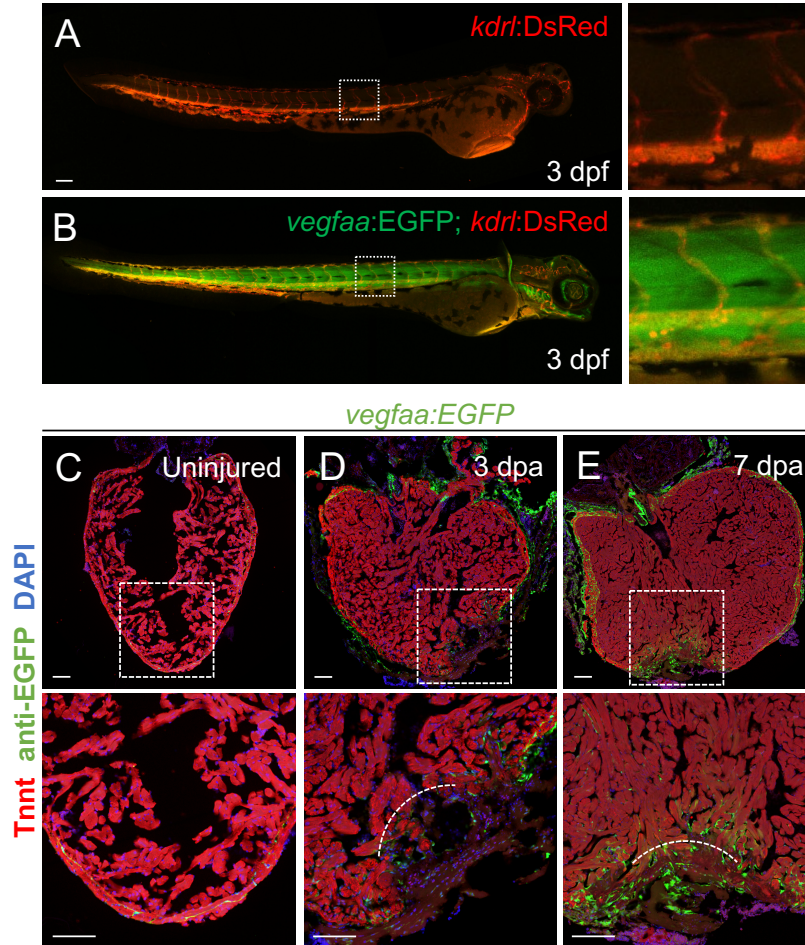

**Figure S1. *vegfaa:EGFP* expression in larval and adult fish.** (A-B) Tile-scanned, maximum intensity projection of the trunk of a *kdr1:DsRed* fish and a *vegfaa:EGFP*; *kdr1:DsRed* fish at 3 dpf. Boxed region corresponds to the magnified region shown in the adjacent panel. (C-E) Tiled images of *vegfaa:EGFP* hearts without injury, at 3 days post amputation (dpa), and at 7 dpa. Sections were immunostained with for EGFP and Tnnt. Boxed region corresponds to the magnified region shown in the adjacent panel. Curved lines approximate the amputation plane. (Scale bars 100 μm)

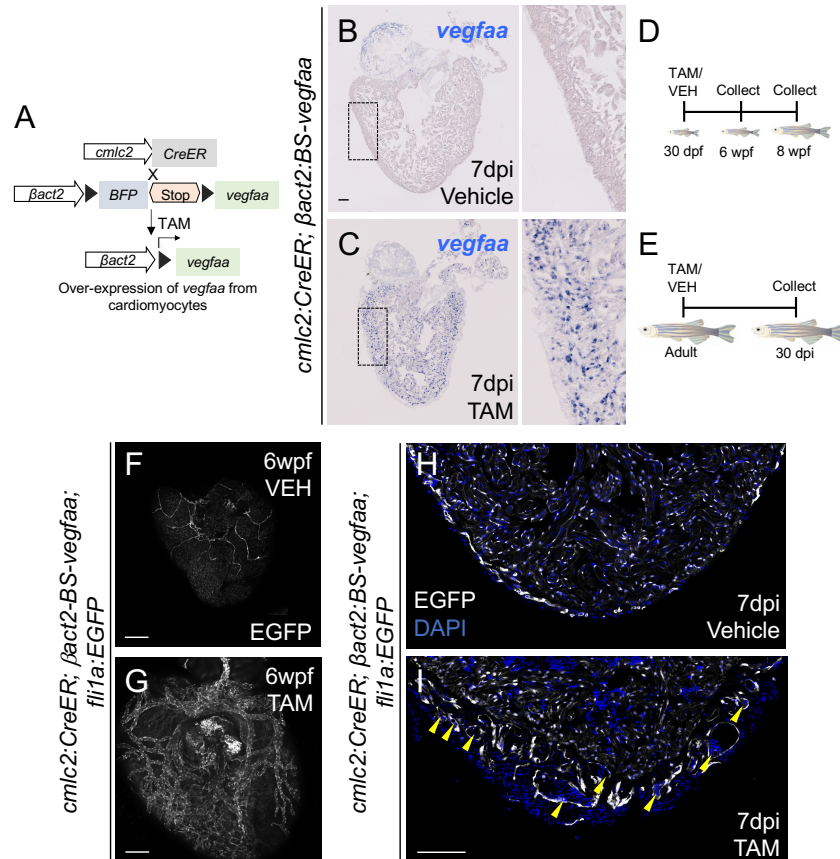

**Figure S2. Transgenic overexpression of *vegfaa* from cardiomyocytes.** (A)

Transgenic approach to overexpress *vegfaa* from cardiomyocytes. (B-C) In situ hybridization for *vegfaa* on sections from ventricles of *cmlc2:CreER;  $\beta$ act2:BS-vegfaa* animals 7 days post incubation (dpi) with vehicle or tamoxifen. Violet staining indicates expression. Boxed region corresponds to the magnified region shown in the adjacent panels. (D-E) Schematic depicting juvenile and adult experiments in Figure 3. (F-G) Tile-scanned images of ventricular surfaces from *cmlc2:CreER;  $\beta$ act2:BS-vegfaa; fli1a:EGFP* fish at 6 wpf following incubation with vehicle or tamoxifen at 30 dpf. (H-I) Tile-scanned images of sections from ventricles of *cmlc2:CreER;  $\beta$ act2:BS-vegfaa; fli1a:EGFP* animals 7 days after treatment with vehicle or tamoxifen. Yellow arrows indicate nucleated blood cells in the lumen of ectopic blood vessels. (Scale bars 100  $\mu$ m)

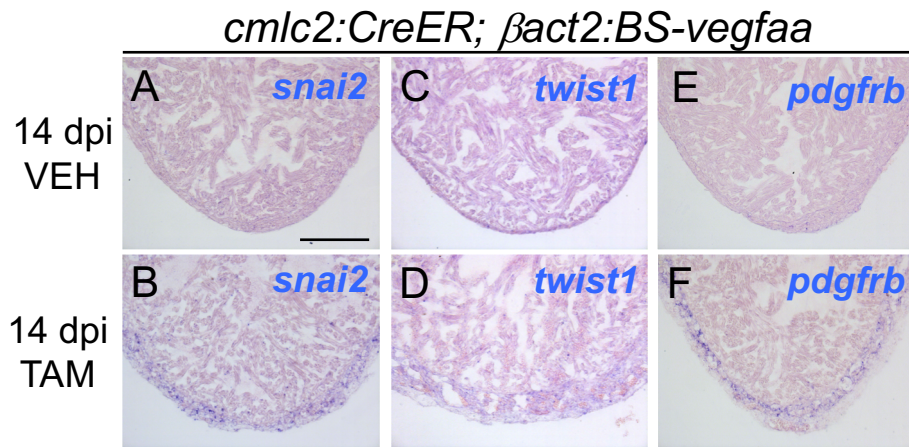

**Figure S3. Cardiac *vegfaa* overexpression induces markers of EMT.** In situ hybridization for *snai2* (A-B), *twist1* (C-D), and *pdgfrb* (E-F) on sections from ventricles of *cmlc2:CreER;  $\beta$ act2:BS-vegfaa* animals 14 days after treatment with vehicle or tamoxifen. Violet staining indicates expression. (Scale bars 100  $\mu$ m)

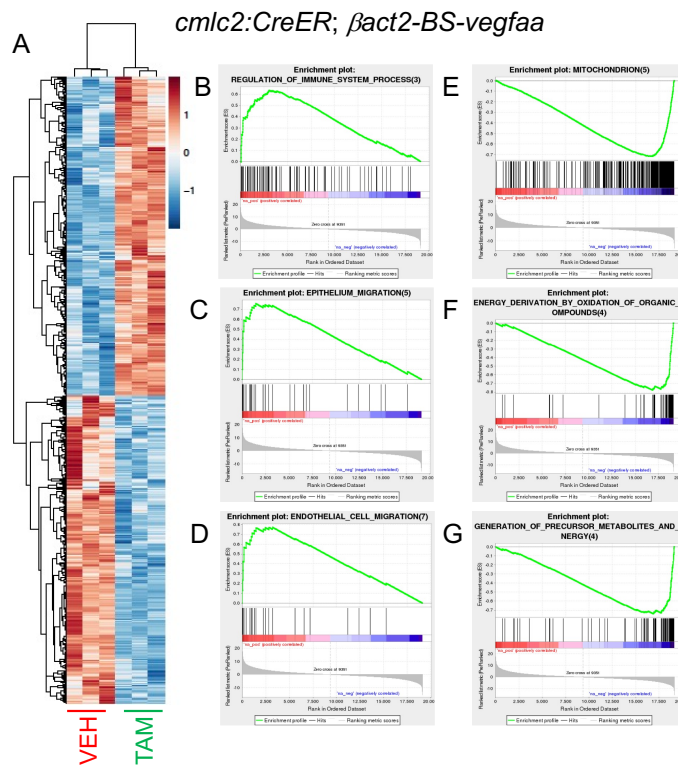

**Figure S4: Transcriptional profiles of *vegfaa* overexpression.** (A) Heatmap of RNA-seq data for *cm1c2:CreER;  $\beta$ act2:BS-vegfaa* hearts 14 days after treatment with vehicle ( $n = 3$ ) or tamoxifen ( $n = 3$ ). (B-D) Selected results for pathways enriched in *vegfaa* overexpression hearts as determined by Gene Set Enrichment Analysis (GSEA). (E-G) Selected results for pathways downregulated in *vegfaa* overexpression hearts as determined by GSEA.



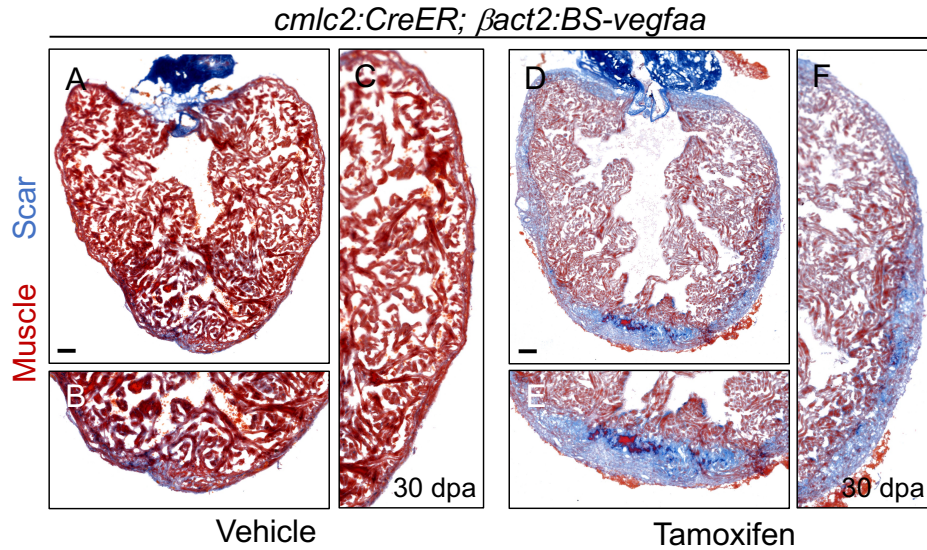

**Figure S5. Cardiac *vegfaa* overexpression causing scarring after ventricular resection.** Picro-Mallory staining of regenerating hearts overexpressing *vegfaa*. Tiled, brightfield images of sections from control animals show limited collagen (blue) at the site of injury and within the ventricular wall (A-C). By contrast, animals overexpressing *vegfaa* have scar at the resection site and throughout the ventricular wall (D-F). (Scale bars 100  $\mu$ m)

**Additional Dataset S1 (separate file). Differentially expressed transcripts following *vegfaa* overexpression.** RNA-Seq was performed using *cm1c2:CreER;  $\beta$ act2:BS-vegfaa* hearts 14 dpi with vehicle (n = 3) or tamoxifen (n = 3). Gene ID corresponds to the Ensembl ID of the mapped transcript. logFC is provided for tamoxifen treated hearts relative to vehicle treated hearts. p-value is the result of an unadjusted t-test.  $p_{adj}$  is the FDR corrected p-value.

## References:

1. Wang J, *et al.* (2011) The regenerative capacity of zebrafish reverses cardiac failure caused by genetic cardiomyocyte depletion. *Development* 138(16):3421-3430.
2. Gemberling M, Karra R, Dickson AL, & Poss KD (2015) Nrg1 is an injury-induced cardiomyocyte mitogen for the endogenous heart regeneration program in zebrafish. *Elife* 4.
3. Kikuchi K, *et al.* (2010) Primary contribution to zebrafish heart regeneration by gata4(+) cardiomyocytes. *Nature* 464(7288):601-605.
4. Kang J, *et al.* (2016) Modulation of tissue repair by regeneration enhancer elements. *Nature* 532(7598):201-206.
5. Foglia MJ, Cao J, Tomini VA, & Poss KD (2016) Multicolor mapping of the cardiomyocyte proliferation dynamics that construct the atrium. *Development* 143(10):1688-1696.
6. Kikuchi K, *et al.* (2011) Retinoic acid production by endocardium and epicardium is an injury response essential for zebrafish heart regeneration. *Dev Cell* 20(3):397-404.
7. Choi WY, *et al.* (2013) In vivo monitoring of cardiomyocyte proliferation to identify chemical modifiers of heart regeneration. *Development* 140(3):660-666.
8. Lawson ND & Weinstein BM (2002) In vivo imaging of embryonic vascular development using transgenic zebrafish. *Developmental Biology* 248(2):307-318.
9. Poss KD, Wilson LG, & Keating MT (2002) Heart regeneration in zebrafish. *Science* 298(5601):2188-2190.
10. Han P, *et al.* (2016) Coordinating cardiomyocyte interactions to direct ventricular chamber morphogenesis. *Nature* 534(7609):700-704.
11. Liu J, *et al.* (2010) A dual role for ErbB2 signaling in cardiac trabeculation. *Development* 137(22):3867-3875.
12. Gupta V, *et al.* (2013) An injury-responsive gata4 program shapes the zebrafish cardiac ventricle. *Curr Biol* 23(13):1221-1227.
13. Pau G, Fuchs F, Sklyar O, Boutros M, & Huber W (2010) EBImage--an R package for image processing with applications to cellular phenotypes. *Bioinformatics* 26(7):979-981.
14. Fang Y, *et al.* (2013) Translational profiling of cardiomyocytes identifies an early Jak1/Stat3 injury response required for zebrafish heart regeneration. *Proc Natl Acad Sci U S A* 110(33):13416-13421.
15. Karra R, Knecht AK, Kikuchi K, & Poss KD (2015) Myocardial NF-kappaB activation is essential for zebrafish heart regeneration. *Proc Natl Acad Sci U S A* 112(43):13255-13260.
16. Wang J, Cao J, Dickson AL, & Poss KD (2015) Epicardial regeneration is guided by cardiac outflow tract and Hedgehog signalling. *Nature* 522(7555):226-230.
17. Mahmoud AI, *et al.* (2015) Nerves Regulate Cardiomyocyte Proliferation and Heart Regeneration. *Dev Cell* 34(4):387-399.
18. Gonzalez-Rosa JM, Martin V, Peralta M, Torres M, & Mercader N (2011) Extensive scar formation and regression during heart regeneration after cryoinjury in zebrafish. *Development* 138(9):1663-1674.
19. Lendrum AC, Fraser DS, Slidders W, & Henderson R (1962) Studies on the character and staining of fibrin. *J Clin Pathol* 15:401-413.
20. Martin M (2011) Cutadapt removes adapter sequences from high-throughput sequencing reads. *EMBnet. journal* 17(1):pp. 10-12.

21. Krueger F (2015) Trim Galore!: A wrapper tool around Cutadapt and FastQC to consistently apply quality and adapter trimming to FastQ files.
22. Kersey PJ, *et al.* (2012) Ensembl Genomes: an integrative resource for genome-scale data from non-vertebrate species. *Nucleic Acids Res* 40(Database issue):D91-97.
23. Dobin A, *et al.* (2013) STAR: ultrafast universal RNA-seq aligner. *Bioinformatics* 29(1):15-21.
24. Anders S, Pyl PT, & Huber W (2015) HTSeq—a Python framework to work with high-throughput sequencing data. *Bioinformatics* 31(2):166-169.
25. Love MI, Huber W, & Anders S (2014) Moderated estimation of fold change and dispersion for RNA-seq data with DESeq2. *Genome Biol* 15(12):550.
26. Huber W, *et al.* (2015) Orchestrating high-throughput genomic analysis with Bioconductor. *Nat Methods* 12(2):115-121.
27. Anonymous (2005) Development Core Team, R: A language and environment for statistical computing. R Foundation for Statistical Computing, Vienna, Austria. ISBN 3-900051-07-0.
28. Mootha VK, *et al.* (2003) PGC-1alpha-responsive genes involved in oxidative phosphorylation are coordinately downregulated in human diabetes. *Nat Genet* 34(3):267-273.
